# Supplementary material for: A Novel Anaerobic Gravity-Driven Dynamic Membrane Bioreactor (AnGDMBR): Performance and Fouling Characterization
Source: MDPI journal article supplement (doi:10.3390/membranes12070683), 2022-06-30
Supplement: s1 [file s1]

**Table S1.** Comparison of the configuration, operation and performance of the current work and other recent studies.

| Reactor configuration | Module configuration | Filtration mode | Support material    | Pore size ( $\mu\text{m}$ ) | Temperature ( $^{\circ}\text{C}$ ) | Membrane total resistance ( $\text{m}^{-1}$ )    | COD removal (%)        | COD rejection (%) | Membrane fouling rate                                         | The range of TMP and flux | Membrane cleaning methods               | Reference  |
|-----------------------|----------------------|-----------------|---------------------|-----------------------------|------------------------------------|--------------------------------------------------|------------------------|-------------------|---------------------------------------------------------------|---------------------------|-----------------------------------------|------------|
| CSTR/submerged        | Flat-sheet           | Gravity-driven  | Nylon net           | 50                          | 37                                 | $1.3 \times 10^{11}$                             | –                      | 56.5-64.5         | 0.04 ( $\text{L}/(\text{m}^2 \cdot \text{h}^2)$ )             | –<br>2-11.5 LMH           | Air back flushing                       | [1]        |
| CSTR/submerged        | Tubular              | Gravity-driven  | Nylon net           | P1: 200<br>P2: 52           | 26.3-26.7                          | –                                                | –                      | –                 | P1: 659 (Pa/h)<br>P2: 830 (Pa/h)                              | 0-30 kPa<br>5-30 LMH      | Surface brushing                        | [2]        |
| UASB/submerged        | Tubular              | Pump-driven     | Nylon polyester net | P1: 70<br>P2: 10            | 35                                 | P1: –<br>P2: $9.2\text{--}37.9 \times 10^{10}$   | P1: 78-96<br>P2: 69-90 | –                 | P1: –<br>P2: 0.6 ( $\text{L}/(\text{m}^2 \cdot \text{h}^2)$ ) | 0-33 kPa<br>12.79-55.4LMH | Tap water                               | [3]        |
| UASB/submerged        | Flat-sheet           | Pump-driven     | Nylon net           | 75                          | 20-25                              | –                                                | 70.6–77.3              | 13.0-21.1         | 15.8-87.5 (Pa/h)                                              | 0-37 kPa<br>22.5-180LMH   | Hydraulic cleaning and surface brushing | [4]        |
| CSTR/submerged        | Flat-sheet           | Pump-driven     | Nylon net           | 20                          | 31-35                              | –                                                | 91                     | 15                | 413 (Pa/h)                                                    | 0-50 kPa<br>4-13LMH       | Biogas back-wash                        | [5]        |
| CSTR/submerged        | Flat-sheet           | Gravity-driven  | Nylon net           | 75                          | –                                  | $0.65\text{--}1.75 \times 10^{11}$               | 88.0-90.2              | –                 | 24.2-24.4 ( $\text{L}/(\text{m}^2 \cdot \text{h}^2)$ )        | <10 kPa<br>140-1620LMH    | Air back flushing and surface brushing  | [6]        |
| CSTR/submerged        | Tubular              | Pump-driven     | Stainless steel net | 48                          | R1: 20-25<br>R2: 37                | R1: $7 \times 10^{11}$<br>R2: $8 \times 10^{11}$ | 97.0-99.2              | –                 | R1: 43.4 (Pa/h)<br>R2: 28.6 (Pa/h)                            | 2-5 kPa<br>2.5-4.3 LMH    | Air back flushing                       | [7]        |
| CSTR/inserted         | Flat-sheet           | Gravity-driven  | Nylon net           | 18                          | 33                                 | $3.2 \times 10^7$                                | 78.4-92.5              | 29.8-62.9         | 23.5 (Pa/h)                                                   | 0-0.8 kPa<br>3-7 LMH      | Mechanical stirring with carrier        | This study |

**Table S2.** Details of the support materials.

| Support material      | Support material<br>yarn type  | Average pore size<br>( $\mu\text{m}$ ) |
|-----------------------|--------------------------------|----------------------------------------|
| 30 g non-woven fabric | staple                         | 35                                     |
| 50 g non-woven fabric | staple                         | 30                                     |
| 70 g non-woven fabric | staple                         | 25                                     |
| 600 mesh nylon net    | mono-monofilament filter cloth | 23                                     |
| 800 mesh nylon net    | mono-monofilament filter cloth | 18                                     |
| 1000 mesh nylon net   | mono-monofilament filter cloth | 13                                     |

**Table S3.** Components of the synthetic wastewater (all the reagents and chemicals were analytical reagent from the Sinopharm Group, China).

| Potion                | The concentration of the pollutant<br>(12 L) | Formula                               | The concentration of the pollutant |
|-----------------------|----------------------------------------------|---------------------------------------|------------------------------------|
| NaHCO <sub>3</sub>    | 15 g                                         |                                       |                                    |
|                       |                                              | Peptone                               | 20.5 (g/L)                         |
|                       |                                              | Beef paste                            | 7.0 (g/L)                          |
| Concentrated solution | 55 mL                                        | Glucose                               | 70.0 (g/L)                         |
|                       |                                              | KH <sub>2</sub> PO <sub>4</sub>       | 5.0 (g/L)                          |
|                       |                                              | NH <sub>4</sub> Cl                    | 38.4 (g/L)                         |
|                       |                                              | FeSO <sub>4</sub> ·7H <sub>2</sub> O  | 0.50 (mg/L)                        |
|                       |                                              | MnCl <sub>2</sub> ·4H <sub>2</sub> O  | 0.12 (mg/L)                        |
|                       |                                              | ZnSO <sub>4</sub> ·7H <sub>2</sub> O  | 0.25 (mg/L)                        |
|                       |                                              | NaMnO <sub>4</sub> ·6H <sub>2</sub> O | 0.38 (mg/L)                        |
| Trace element         | 10 mL                                        | CoCl <sub>4</sub> ·6H <sub>2</sub> O  | 0.26 (mg/L)                        |
|                       |                                              | NiCl <sub>2</sub> ·6H <sub>2</sub> O  | 0.08 (mg/L)                        |
|                       |                                              | CuSO <sub>4</sub> ·5H <sub>2</sub> O  | 0.18 (mg/L)                        |
|                       |                                              | CaCl <sub>2</sub>                     | 0.88 (mg/L)                        |
|                       |                                              | H <sub>3</sub> BO <sub>3</sub>        | 0.12 (mg/L)                        |
|                       |                                              | MgCl <sub>2</sub> ·6H <sub>2</sub> O  | 0.26 (mg/L)                        |

**Table S4.** Distribution of fouling resistances of different supporting materials.

|                             | Rc (m <sup>-1</sup> ) | Rb (m <sup>-1</sup> ) | Rf (m <sup>-1</sup> ) | Rm (m <sup>-1</sup> ) | Rt (m <sup>-1</sup> ) | Rf/Rt    |
|-----------------------------|-----------------------|-----------------------|-----------------------|-----------------------|-----------------------|----------|
| <b>30g non-woven fabric</b> | 3.69E+10              | 1.28E+04              | 2.12E+04              | 1.86E+06              | 3.69E+10              | 5.74E-07 |
| <b>50g non-woven fabric</b> | 2.22E+13              | 2.60E+04              | 3.32E+04              | 1.88E+06              | 2.22E+13              | 1.50E-09 |
| <b>70g non-woven fabric</b> | 3.21E+13              | 1.46E+05              | 3.62E+05              | 1.91E+06              | 3.21E+13              | 1.13E-08 |
| <b>600 mesh nylon net</b>   | 1.16E+09              | 1.22E+04              | 2.06E+04              | 1.60E+06              | 1.16E+09              | 1.77E-05 |
| <b>800 mesh nylon net</b>   | 2.06E+13              | 2.50E+04              | 2.80E+04              | 1.94E+06              | 2.06E+13              | 1.36E-09 |
| <b>1000 mesh nylon net</b>  | 2.62E+14              | 3.29E+04              | 6.47E+04              | 2.01E+06              | 2.62E+14              | 2.47E-10 |

**Table S5.** Effluent quality of 50g non-woven fabric and 800 mesh nylon net with five fouling-physical cleaning cycles.

| Items                        | Cycles | Polysaccharide | Protein | COD    | Rejection rate (%) |         |       |
|------------------------------|--------|----------------|---------|--------|--------------------|---------|-------|
|                              |        | (mg/L)         | (mg/L)  | (mg/L) | Polysaccharide     | Protein | COD   |
| <b>Supernatant of sludge</b> |        | 23.81          | 12.89   | 242.52 |                    |         |       |
| <b>50g non-woven fabric</b>  | 1      | 14.70          | 6.16    | 87.03  | 38.25              | 52.21   | 64.11 |
|                              | 2      | 12.34          | 6.15    | 81.27  | 48.15              | 53.39   | 66.49 |
|                              | 3      | 11.98          | 5.73    | 78.39  | 49.66              | 55.55   | 67.68 |
|                              | 4      | 11.74          | 5.72    | 75.51  | 50.67              | 55.62   | 68.86 |
|                              | 5      | 9.73           | 5.23    | 61.12  | 59.11              | 59.43   | 74.80 |
| <b>800 mesh nylon net</b>    | 1      | 11.98          | 3.96    | 78.39  | 49.66              | 69.28   | 67.68 |
|                              | 2      | 11.27          | 3.79    | 66.88  | 52.64              | 70.60   | 72.42 |
|                              | 3      | 9.73           | 3.62    | 64.00  | 59.11              | 71.92   | 73.61 |
|                              | 4      | 9.50           | 3.54    | 58.24  | 60.08              | 72.54   | 75.99 |
|                              | 5      | 8.91           | 3.37    | 49.60  | 62.55              | 73.86   | 79.55 |

**Table S6.** Residual foulants amount of 50g non-woven fabric and 800 mesh nylon net were operated with five fouling-physical cleaning cycles.

| Items                        | Cycles | SS in permeate (g) | SS in cake layer (g) | The total SS (g) | Residual SS in the pore (g) |
|------------------------------|--------|--------------------|----------------------|------------------|-----------------------------|
| <b>Supernatant of sludge</b> |        | 0.1239             | 0                    | 0.1239           | 0                           |
| <b>50g non-woven fabric</b>  | 1      | 0.0579             | 0.0614               | 0.1193           | 0.0046                      |
|                              | 2      | 0.0564             | 0.0622               | 0.1186           | 0.0053                      |
|                              | 3      | 0.0561             | 0.0621               | 0.1182           | 0.0057                      |
|                              | 4      | 0.0558             | 0.0622               | 0.1180           | 0.0059                      |
|                              | 5      | 0.0552             | 0.0635               | 0.1187           | 0.0052                      |
| <b>800 mesh nylon net</b>    | 1      | 0.0570             | 0.0646               | 0.1216           | 0.0023                      |
|                              | 2      | 0.0534             | 0.0683               | 0.1217           | 0.0022                      |
|                              | 3      | 0.0519             | 0.0684               | 0.1203           | 0.0036                      |
|                              | 4      | 0.0513             | 0.0689               | 0.1202           | 0.0037                      |
|                              | 5      | 0.0504             | 0.0699               | 0.1203           | 0.0036                      |

**Table S7.** Performance of the AnGDMBR.

| Samples            | Items                  | Concentration |
|--------------------|------------------------|---------------|
| B.S.               | TSS(g/L)               | 3.78±0.10     |
| C.L.               | TSS(g/m <sup>2</sup> ) | 0.66±0.03     |
|                    | COD                    | 464.73±17.31  |
| Inf. (mg/L)        | PS                     | 330.79±5.25   |
|                    | PN                     | 452.77±1.83   |
|                    | COD                    | 136.67±68.33  |
| Sup. (mg/L)        | PS                     | 24.48±6.20    |
|                    | PN                     | 19.71±7.76    |
|                    | COD                    | 67.74±33.24   |
| Eff. (mg/L)        | PS                     | 6.10±4.36     |
|                    | PN                     | 7.19±5.95     |
|                    | PS                     | 22.67±7.61    |
| EPS (mg/L)         | PN                     | 16.93±6.86    |
|                    | COD                    | 85.45±7.06    |
| Removal rate (%)   | PS                     | 98.15±1.33    |
|                    | PN                     | 83.32±13.62   |
|                    | COD                    | 46.34±16.50   |
| Retention rate (%) | PS                     | 75.24±17.35   |
|                    | PN                     | 66.39±17.66   |

**Table S8.** Influent (Inf.), supernatant (Sup.), cake layer (C.K.) and effluent (Eff.) fluorescence parameters.

| Peak location Ex (nm)/Em(nm) |                     | Substance               | Fluorescence Intensity |       |       |       |
|------------------------------|---------------------|-------------------------|------------------------|-------|-------|-------|
|                              |                     |                         | Inf.                   | Sup.  | C.K.  | Eff.  |
| A                            | 230/<br>335-340     | Aromatic protein        | 3539                   | 1006  | 2107  | 1358  |
| B                            | 280/<br>335-340     | Tryptophan protein-like | 6774                   | 2074  | 2593  | 1367  |
| C                            | 330-335/<br>400-420 | Humic acidlike          | 616.3                  | 688.4 | 317.4 | 714.4 |
| D                            | 238-240/<br>415-435 | Fulvic acidlike         | 340                    | 442   | 344   | 670   |

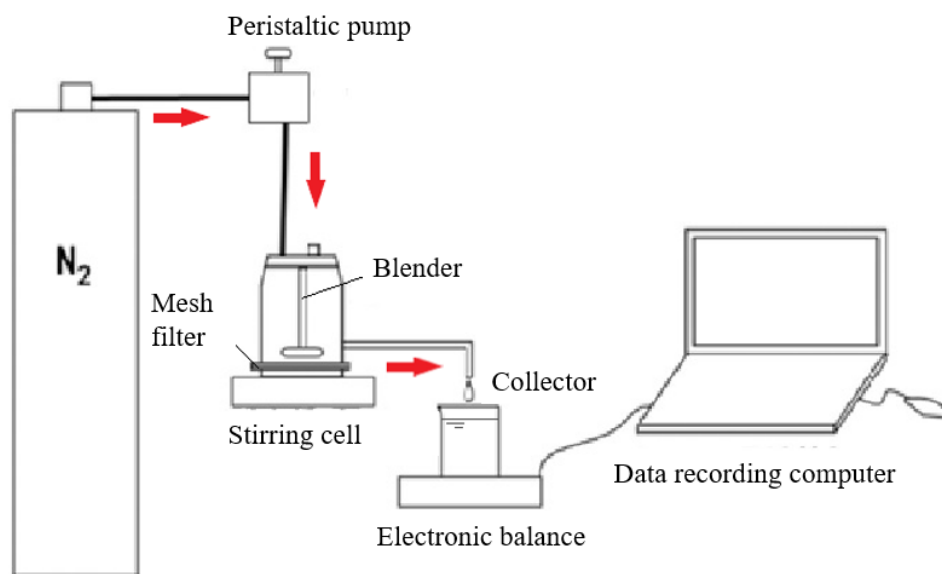

**Figure S1.** Experimental setup of dead-end filtration.

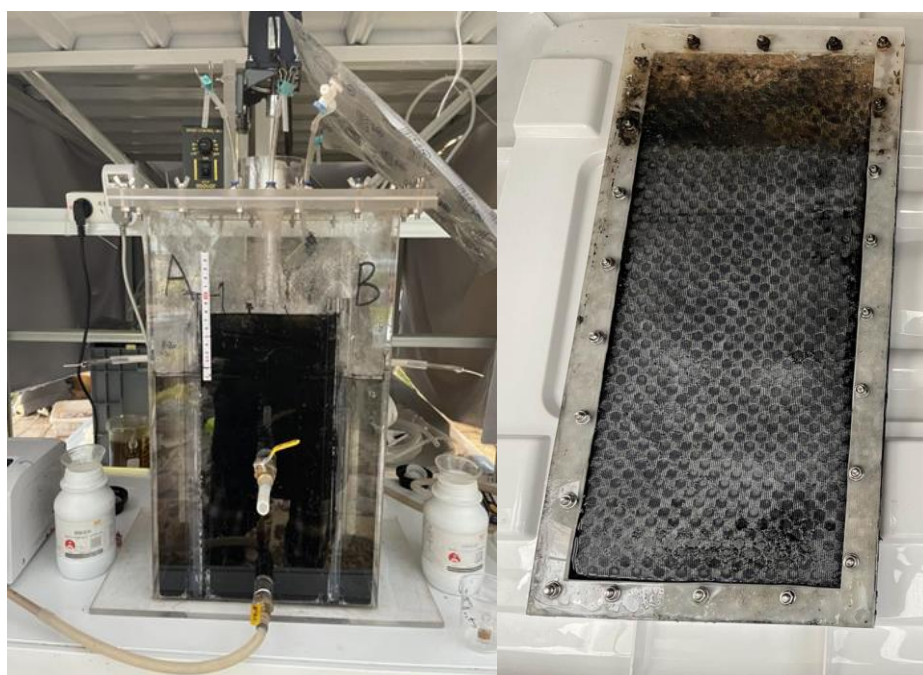

**Figure S2.** The picture of the AnGDMBR setup and membrane module.

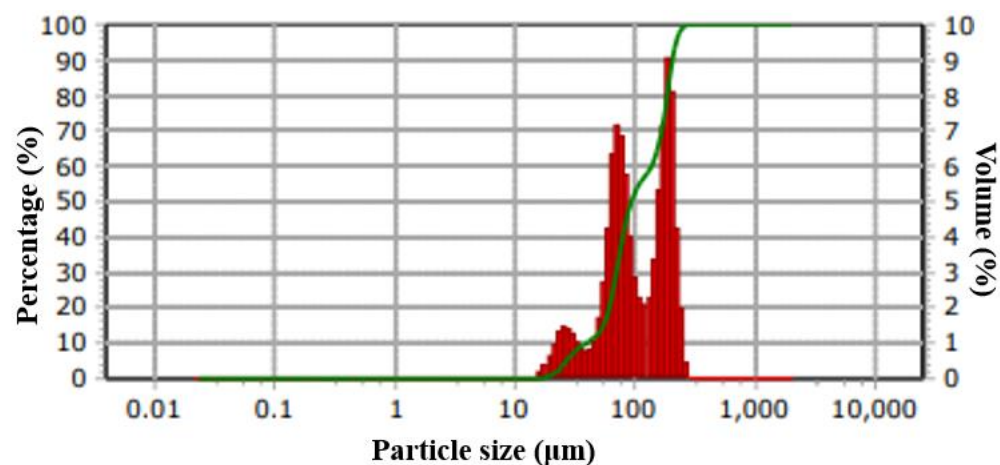

Figure S3. Particle size distribution of the bulk sludge in the AnGDMBR.

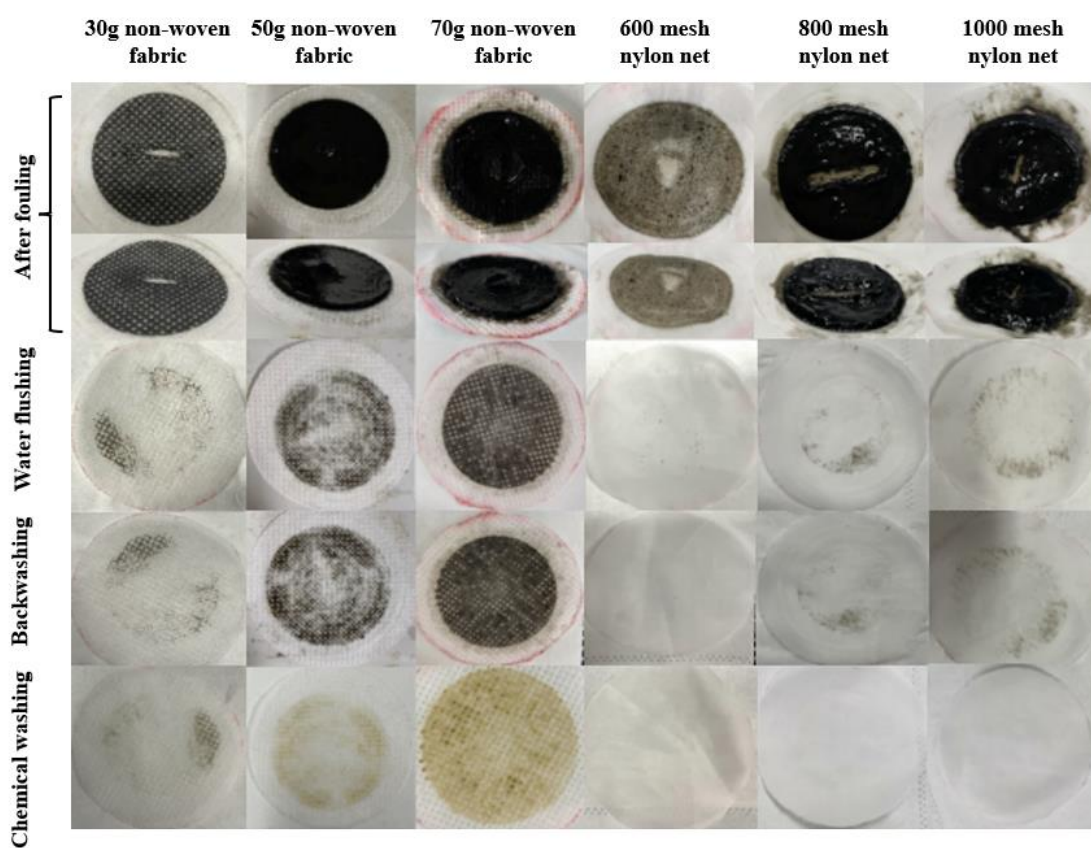

Figure S4. Surface conditions of different support materials after cleaning at different stages.

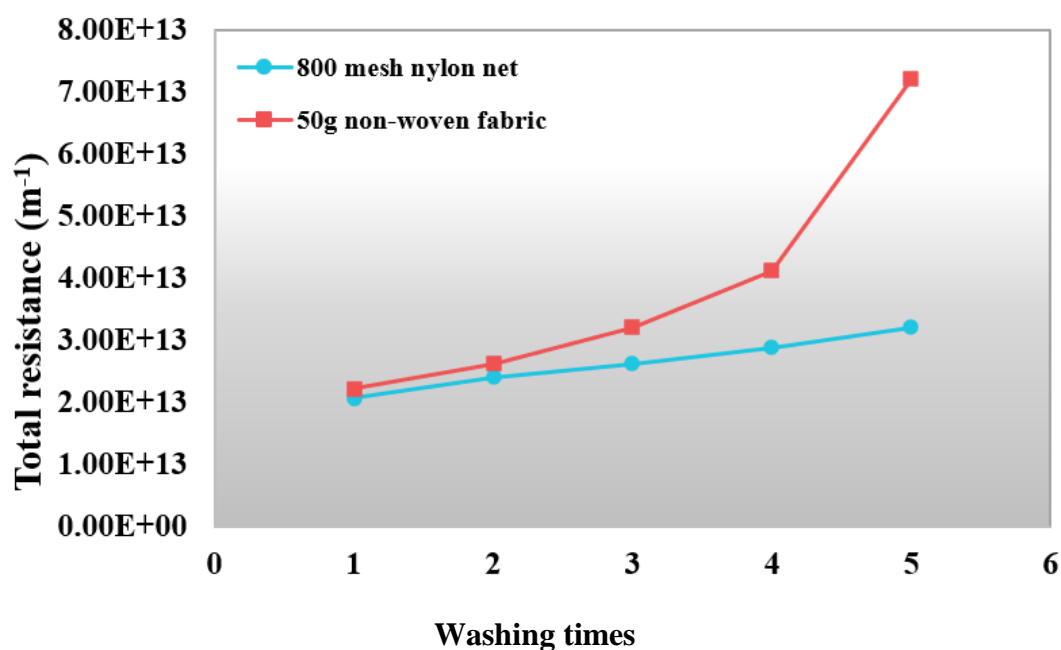

Figure S5. Total fouling resistances for 50g non-woven fabric and 800 mesh nylon net.

## References

1. Tang, J.; Wang, X.C.; Hu, Y.; Ngo, H.H.; Li, Y. Dynamic membrane-assisted fermentation of food wastes for enhancing lactic acid production. *Bioresour. Technol.* **2017**, *234*, 40-47. doi:<https://doi.org/10.1016/j.biortech.2017.03.019>.
2. Saleem, M.; Masut, E.; Spagni, A.; Lavagnolo, M.C. Exploring dynamic membrane as an alternative for conventional membrane for the treatment of old landfill leachate. *J Environ Manage.* **2019**, *246*, 658-667. doi:<https://doi.org/10.1016/j.jenvman.2019.06.025>.
3. Paçal, M.; Semerci, N.; Çallı, B. Treatment of synthetic wastewater and cheese whey by the anaerobic dynamic membrane bioreactor. *Environ. Sci. Pollut. Res.* **2019**, *26*, 32942-32956. doi:10.1007/s11356-019-06397-z.
4. Yang, Y.; Zang, Y.; Hu, Y.; Wang, X.C.; Ngo, H.H. Upflow anaerobic dynamic membrane bioreactor (AnDMBR) for wastewater treatment at room temperature and short HRTs: Process characteristics and practical applicability. *Chem. Eng. J.* **2020**, *383*, 123186. doi:<https://doi.org/10.1016/j.cej.2019.123186>.
5. Yurtsever, A.; Basaran, E.; Ucar, D.; Sahinkaya, E. Self-forming dynamic membrane bioreactor for textile industry wastewater treatment. *Sci Total Environ.* **2021**, *751*, 141572. doi:<https://doi.org/10.1016/j.scitotenv.2020.141572>.
6. Yang, Y.; Deng, W.; Hu, Y.; Chen, R.; Wang, X.C. Gravity-driven high flux filtration behavior and microbial community of an integrated granular activated carbon and dynamic membrane bioreactor for domestic wastewater treatment. *Sci Total Environ.* **2022**, *825*, 153930. doi:<https://doi.org/10.1016/j.scitotenv.2022.153930>.
7. Pan, W.; Ouyang, H.; Tan, X.; Deng, R.; Gu, L.; He, Q. Anaerobic dynamic membrane bioreactors for synthetic blackwater treatment under room temperature and mesophilic conditions. *Bioresour. Technol.* **2022**, *355*, 127295. doi:<https://doi.org/10.1016/j.biortech.2022.127295>.
